# Supplementary material
Source: Springer Nature journal article supplement (https://www.springermedizin.de/resource/supplementary/12955_2006_267_MOESM2_ESM.pdf/9560030)

a) Daily Activities: Item 35 (eating meals)

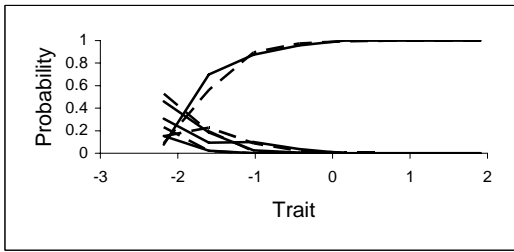

b) Item 38 (getting in/out of a car)

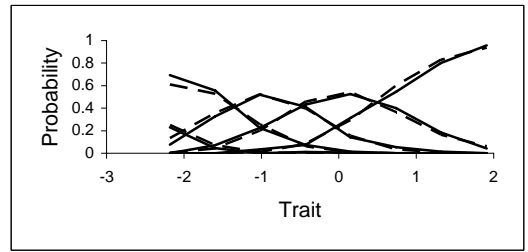

c) Walking: Item 33 (running/jogging 2 miles)

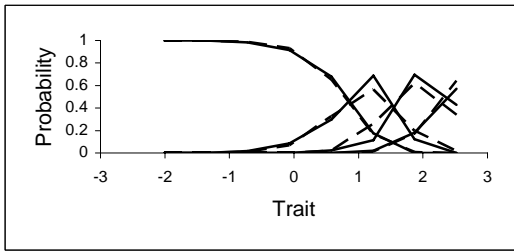

d) Item 35\* (standing on toes)

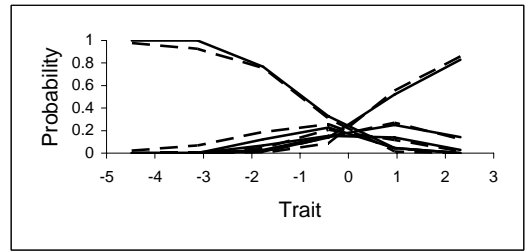

e) Handling Objects: Item 44 (grocery bag)

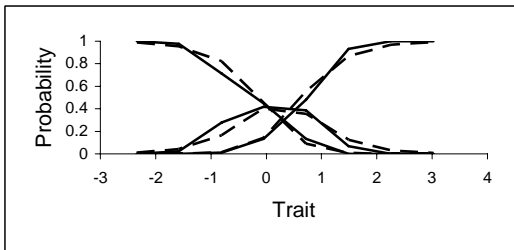

f) Item 49\* (light furniture)

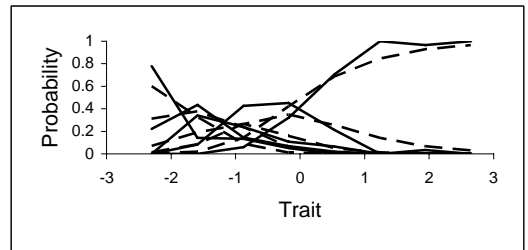

g) Pain or Discomfort: Item 3 (prevents activities)

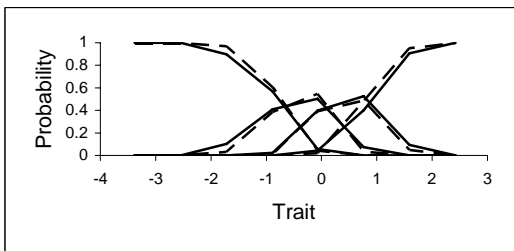

h) Item 19\* (perfectly healthy)

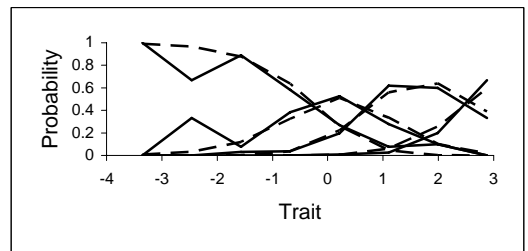

i) Feelings: Item 40 (thinking killing self)

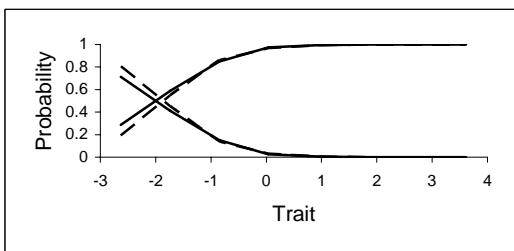

j) Item 44\* (totally relaxed)

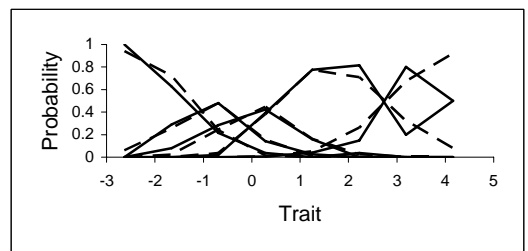

Supplement: MOESM2 [file 9560030]
